# Supplementary material
Source: publisher figshare collection journal article supplement (https://sage.figshare.com/ndownloader/files/20467974)
Supplement: Supplementary file 1 [file 20467974]

**Supplementary Figure 1.** Visual comparison of the musical feedback group (group 1) and the control group (group 2) for the Geriatric Depression Scale and Beck Anxiety Inventory over each time point.
